# Supplementary material for: Enhanced electrocatalytic performance in dye-sensitized solar cell via coupling CoSe2@N-doped carbon and carbon nanotubes
Source: Royal Society of Chemistry journal article supplement (doi:10.1039/d1tc01205c), 2021-01-01
Supplement: d1tc01205c1.pdf [file d1tc01205c1.pdf]

**Supporting Information**

**Enhanced electrocatalytic performance in dye-sensitized  
solar cell via coupling CoSe<sub>2</sub>@N-doped carbon and  
carbon nanotubes**

*Wen Wang<sup>‡,1</sup>, Qiaoyu Cui<sup>‡,1</sup>, Dong Sun<sup>1,2</sup>, Qun Yang<sup>1</sup>, Jun Xu<sup>2</sup>, Wei Liao<sup>1</sup>, Xueqin*

*Zuo<sup>1</sup>, Huaibao Tang<sup>1</sup>, Guang Li<sup>\*1</sup>, Shaowei Jin<sup>\*1</sup>*

<sup>1</sup>School of Physics and Materials Science, Institute of Physical Science and  
Information Technology, Anhui Key Laboratory of Information Materials and  
Devices, Anhui University, No. 111, Jiulong Road, Shushan District, Hefei 230601,  
China.

<sup>2</sup>ABA Chemicals Corporation, Suzhou, 215433, China.

---

\* Corresponding author. E-mail: jinsw@mail.ustc.edu.cn (S. J.); liguang1971@ahu.edu.cn (G. L.)

‡ Wen Wang and Qiaoyu Cui contributed equally.

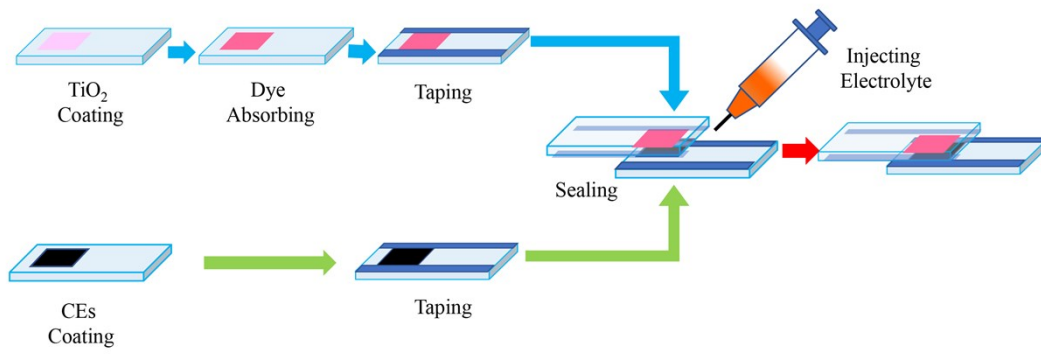

**Fig. S1** Schematic illustration of the DSSCs assembly.

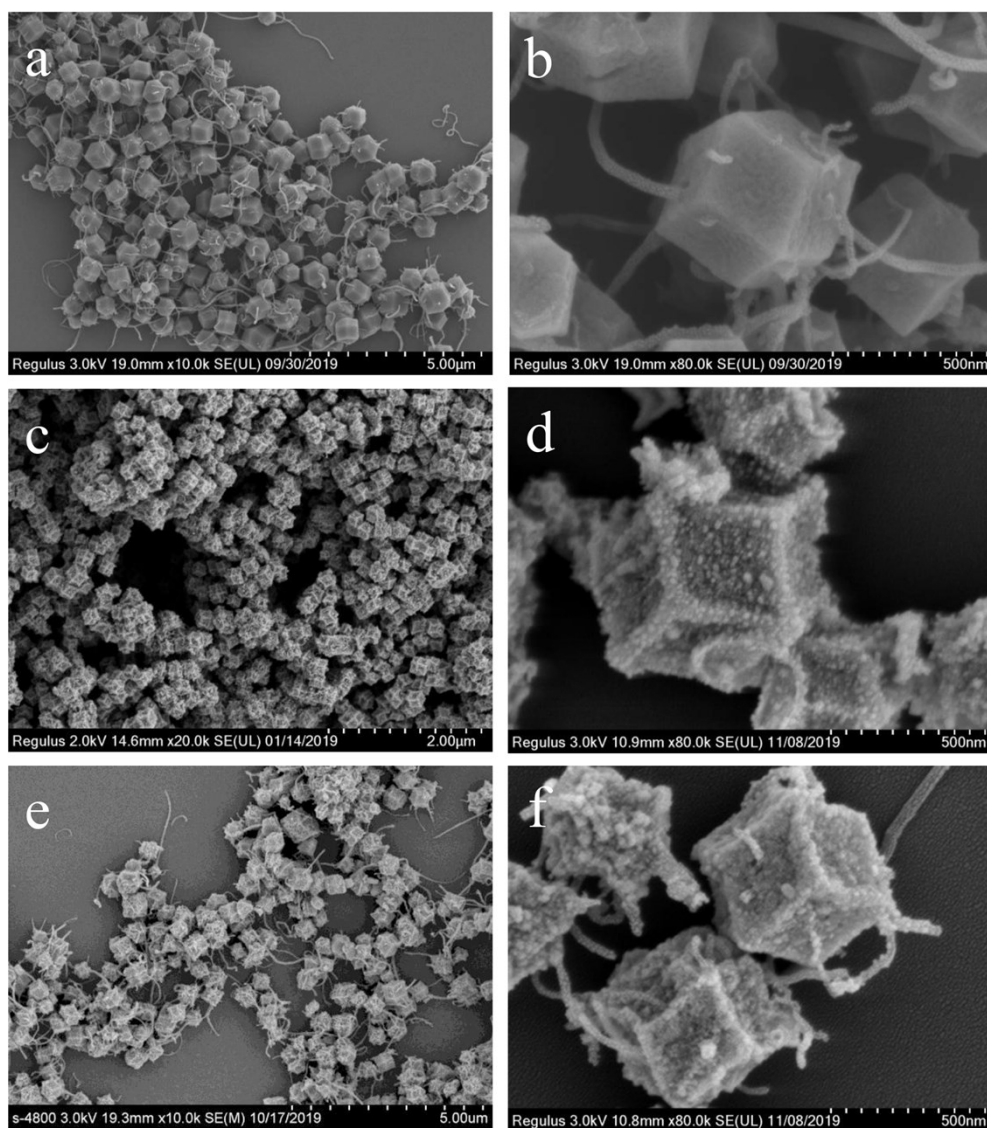

**Fig. S2** SEM images of (a, b) ZIF-67-CNTs hybrids, (c, d) CoSe<sub>2</sub>@NC, (e, f) CoSe<sub>2</sub>@NC-CNTs hybrids.

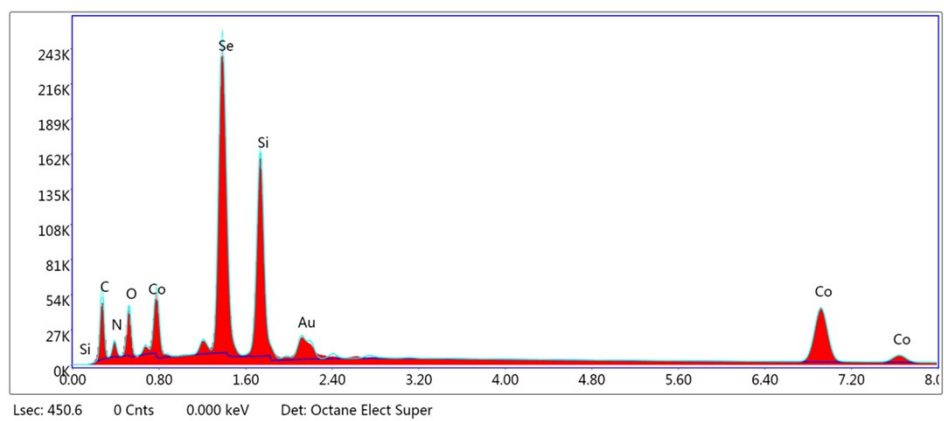

**Fig. S3** EDX spectrum of  $\text{CoSe}_2@$ NC-CNTs hybrids.

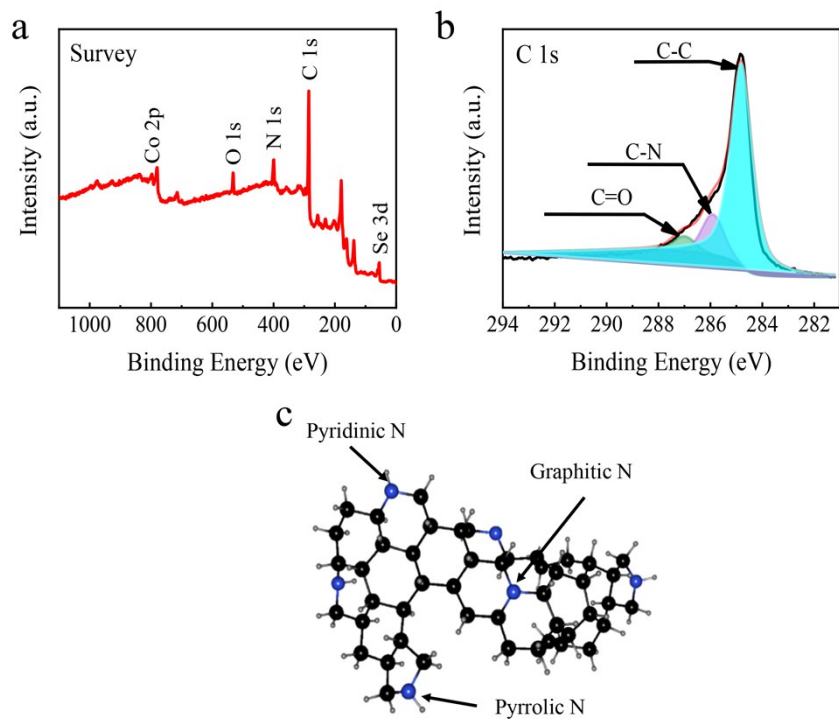

**Fig. S4** (a) Full-survey-scan XPS spectrum of CoSe<sub>2</sub>@NC-CNTs hybrids. (b) High-resolution XPS spectra of C. (c) Schematic illustration of the possible N-bonding configurations.

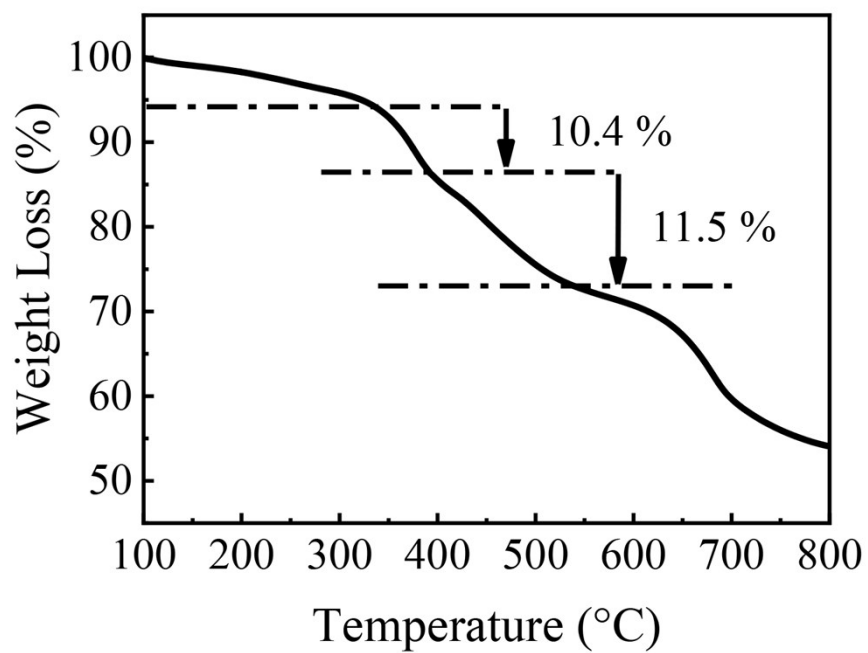

**Fig. S5** Thermogravimetric analysis curves of CoSe<sub>2</sub>@NC-CNTs hybrids.

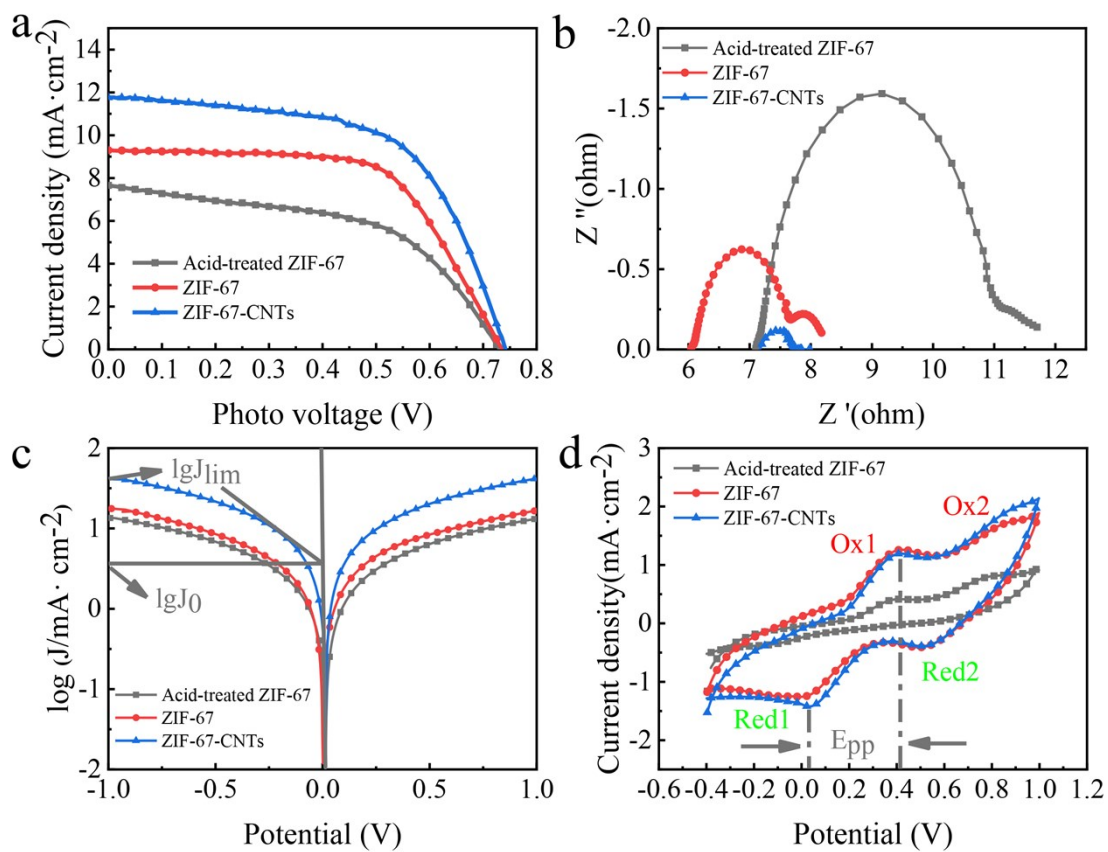

**Fig. S6** (a) J-V curves, (b) EIS Nyquist plots, (c) Tafel polarization curves, and (d) CV curves of Acid-treated ZIF-67, ZIF-67, and ZIF-67-CNTs hybrids.

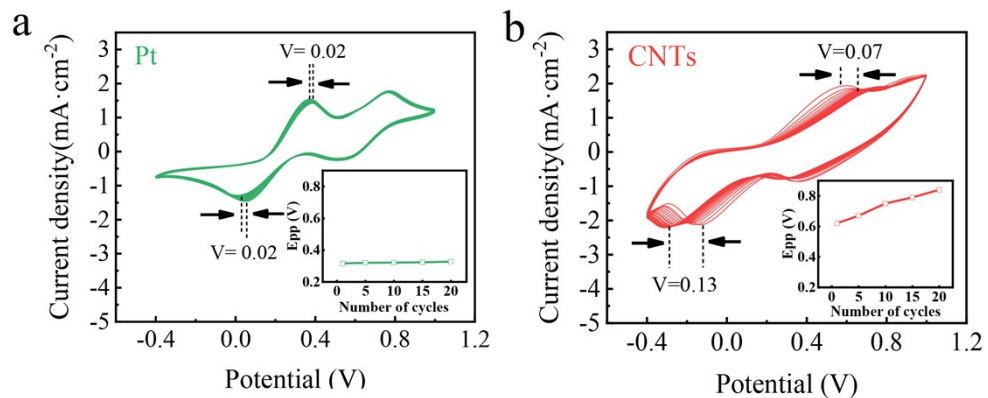

**Fig. S7** 20 cycles of CV curves to check the stabilization of (a) Pt, and (b) CNTs



**Table S1. Related Parameters of Relevant References**

| CEs                       | $J_{sc}$<br>(mA·cm <sup>-2</sup> ) | $V_{oc}$<br>(V) | $FF$<br>(%) | PCE<br>(%) | Ref.                                                               |
|---------------------------|------------------------------------|-----------------|-------------|------------|--------------------------------------------------------------------|
| Ti <sub>1</sub> /rGO      | 16.53                              | 0.840           | 64.00       | 8.83       | <i>Adv. Mater.</i> <b>2020</b> , 2000478                           |
| ZIF-ZnSe-NC-<br>11 wt%    | 16.40                              | 0.770           | 69.00       | 8.69       | <i>J. Mater. Chem. A</i> <b>2018</b> , 6 (12),<br>5107             |
| CoFeNiMo@N<br>CNT-800-8-5 | 14.71                              | 0.731           | 60.00       | 6.46       | <i>Appl. Catal. B: Environ.</i> <b>280</b> <b>2021</b> ,<br>119421 |
| CoSe <sub>2</sub> /NC     | 17.31                              | 0.72            | 67.00       | 9.06       | <i>ACS Sustain. Chem. Eng.</i> , <b>2019</b> , 7,<br>2784–2791     |
| CoSe <sub>2</sub> -160    | 17.04                              | 0.74            | 66.20       | 8.38       | <i>Electrochim. Acta</i> , <b>2015</b> , 168, 69–<br>75.           |

**Table S2. PCE Values and Relevant Parameters of Different CEs.**

| CEs                 | $J_{sc}$<br>(mA·cm <sup>-2</sup> ) | $V_{oc}$<br>(V) | FF<br>(%) | PCE<br>(%) |
|---------------------|------------------------------------|-----------------|-----------|------------|
| Acid-treated ZIF-67 | 7.64                               | 0.74            | 52.14     | 2.93       |
| ZIF-67              | 9.29                               | 0.74            | 58.05     | 4.19       |
| ZIF-67-CNTs         | 11.76                              | 0.73            | 54.38     | 5.00       |

**Table S3. Electrochemical Performance Parameters for Different CEs.**

| CEs                 | $R_s$<br>( $\Omega \cdot \text{cm}^2$ ) | $R_{ct}$<br>( $\Omega \cdot \text{cm}^2$ ) | $\lg J_0$<br>( $\text{mA} \cdot \text{cm}^{-2}$ ) | $\lg J_{lim}$<br>( $\text{mA} \cdot \text{cm}^{-2}$ ) | $E_{pp}$<br>(V) |
|---------------------|-----------------------------------------|--------------------------------------------|---------------------------------------------------|-------------------------------------------------------|-----------------|
| Acid-treated ZIF-67 | 7.10                                    | 2.46                                       | 1.13                                              | 0.16                                                  | > 0.70          |
| ZIF-67              | 7.42                                    | 0.79                                       | 1.24                                              | 0.28                                                  | 0.39            |
| ZIF-67-CNTs         | 7.16                                    | 0.31                                       | 1.60                                              | 0.52                                                  | 0.37            |
